# Supplementary material for: TagF-mediated repression of bacterial type VI secretion systems involves a direct interaction with the cytoplasmic protein Fha
Source: PubMed Central journal article supplement (PMC5995506; doi:10.1074/jbc.ra117.001618), 2018-03-29
Supplement: supp_RA117.001618_134892_1_supp_91518_p5bxyg.pdf [file supp_RA117.001618_134892_1_supp_91518_p5bxyg.pdf]

## Supporting Information S1

**The growth conditions.** *A. tumefaciens* was grown at 25 °C in 523 (1), whereas LB (2) were routinely used for *E. coli* and *P. aeruginosa* strains at 37 °C unless indicated. The plasmids were maintained by the addition of 50 µg/mL gentamycin (Gm) and 200 µg/mL spectinomycin (Sp) for *A. tumefaciens* and 100 µg/mL ampicillin (Ap), 100 µg/mL spectinomycin (Sp), 20 µg/mL kanamycin (Km), and 50 µg/mL Gm for *E. coli*, and 50 µg/mL Gm, and 2000 µg/mL Sp for *P. aeruginosa*. Growth conditions are as previously described (3,4).

**Plasmid construction and generation of in-frame deletion mutants.** Plasmid pJQ200KS- $\Delta$ *ppkA* $\Delta$ *tagF*-*pppA* (Supplementary Table S1) was created by ligating the *Xba*I/*Bam*HI-digested PCR product 1 (~500 bp DNA fragment upstream of *tagF*-*pppA* gene) and the *Bam*HI/*Xma*I-digested PCR product 2 (~500 bp DNA fragment downstream of *ppkA* gene) into *Xba*I/*Xma*I sites of pJQ200KS (5) and used to generate the *ppkA* and *tagF*-*pppA* genes deletion mutant (Supplementary Tables S1 and S2). The resulting strain was confirmed by PCR and designated as EML4307 ( $\Delta$ *ppkA* $\Delta$ *tagF*-*pppA*).

To construct the plasmids for expressing proteins in *A. tumefaciens*, each DNA fragment containing the ribosomal-binding sequence (RBS) and ORF (with stop codon) of *tagF*-*pppA*, *tagF*, *tagF*-*Strep*, *tagF*<sup>GK</sup>-*Strep*, *tagF*<sup>DF</sup>-*Strep*, *tagF*<sup>DW</sup>-*Strep*, *tagF*<sup>SDR</sup>-*Strep*, *tagF*<sup>FD</sup>-*Strep*, and *pppA* were PCR-amplified with primers described in Supplementary Table S2 and respectively cloned into pTrc200 (6) with appropriate enzyme sites to create the plasmids pTrc-TagF-PppA, pTrc-TagF, pTrc-TagF-*Strep*, pTrc-TagF<sup>GK</sup>-*Strep*, pTrc-TagF<sup>DF</sup>-*Strep*, pTrc-TagF<sup>DW</sup>-*Strep*, pTrc-TagF<sup>SDR</sup>-*Strep*, pTrc-TagF<sup>FD</sup>-*Strep*, and pTrc-PppA.

To construct the plasmids for expressing proteins in *P. aeruginosa*, the gene of interest containing its RBS and ORF was cloned to be driven by a *lac* promoter on the broad host range vector pRL662 (7). The PCR products of *P. aeruginosa* *tagF*, *tagF*-*Strep*, *tagF*<sup>GK</sup>-*Strep*, and *tagF*<sup>SDR</sup>-*Strep* were amplified with primers described in Supplementary Table S2 and respectively digested by *Xho*I/*Xba*I, and cloned into the same sites of pRL662, which resulted in the plasmids pTagF<sup>Pa</sup>, pTagF<sup>Pa</sup>-*Strep*, pTagF<sup>Pa-GK</sup>-*Strep*, and pTagF<sup>Pa-SDR</sup>-*Strep*. The PCR product of *P. aeruginosa* *fha1*-HA was amplified with primers described in Supplementary Table S2 and cloned into pTrc200 with appropriate enzyme sites, which resulted in the plasmid pTrc-Fha1<sup>Pa</sup>-HA.

To construct the plasmid for protein expression in *E. coli*, the DNA fragment containing *tagF* 1-214 was PCR-amplified with primers described in Supplementary Table S2 and cloned into pET28a(+) to create the plasmid pET28a(+)-TagF 1-214.

For the constructs used for yeast two-hybrid, the *fha*, *tagF*-*pppA*, *tagF*, *tagF*<sup>GK</sup>, *tagF*<sup>DF</sup>,

*tagF<sup>DW</sup>*, *tagF<sup>SDR</sup>*, *tagF<sup>FD</sup>*, *tagF<sup>Pa</sup>*, *tagF<sup>Pa-GK</sup>*, *tagF<sup>Pa-SDR</sup>*, and *fha1<sup>Pa</sup>* ORFs (without stop codon) were PCR-amplified with primers described in Supplementary Table S2 and respectively cloned into pGBKT7 or pGADT7 with appropriate enzyme sites to create the plasmids pGBKT7-TagF-PppA, pGBKT7-TagF, pGBKT7-TagF<sup>GK</sup>, pGBKT7-TagF<sup>DF</sup>, pGBKT7-TagF<sup>DW</sup>, pGBKT7-TagF<sup>SDR</sup>, pGBKT7-TagF<sup>FD</sup>, pGBKT7-TagF<sup>Pa</sup>, pGBKT7-TagF<sup>Pa-GK</sup>, pGBKT7-TagF<sup>Pa-SDR</sup>, pGBKT7-Fha1<sup>Pa</sup>, pGADT7-Fha, pGADT7-TagF, pGADT7-TagF<sup>Pa</sup>, and pGADT7-Fha1<sup>Pa</sup>, respectively.

For the constructs used for bacterial two-hybrid, the *tagF<sup>Pa</sup>* and *fha1<sup>Pa</sup>* ORFs (without stop codon) were PCR-amplified with primers described in Supplementary Table S2 and respectively cloned into pKT25 (8) or pUT18C (8) with appropriate enzyme sites to create the plasmids pKT25-TagF<sup>Pa</sup>, pKT25-Fha1<sup>Pa</sup>, pUT18C-TagF<sup>Pa</sup>, and pUT18C-Fha1<sup>Pa</sup>, respectively.

## References

1. Kado, C. I., and Heskett, M. G. (1970) Selective media for isolation of *Agrobacterium*, *Corynebacterium*, *Erwinia*, *Pseudomonas*, and *Xanthomonas*. *Phytopathology* **60**, 969-976
2. Bertani, G. (1951) Studies on lysogeny. I. The mode of phage liberation by lysogenic *Escherichia coli*. *J Bacteriol* **62**, 293-300
3. Lossi, N. S., Manoli, E., Simpson, P., Jones, C., Hui, K., Dajani, R., Coulthurst, S. J., Freemont, P., and Filloux, A. (2012) The archetype *Pseudomonas aeruginosa* proteins TssB and TagJ form a novel subcomplex in the bacterial type VI secretion system. *Mol Microbiol* **86**, 437-456
4. Lin, J. S., Ma, L. S., and Lai, E. M. (2013) Systematic Dissection of the *Agrobacterium* Type VI Secretion System Reveals Machinery and Secreted Components for Subcomplex Formation. *PLoS One* **8**, e67647
5. Quandt, J., and Hynes, M. F. (1993) Versatile suicide vectors which allow direct selection for gene replacement in gram-negative bacteria. *Gene* **127**, 15-21
6. Schmidt-Eisenlohr, H., Domke, N., and Baron, C. (1999) TraC of IncN plasmid pKM101 associates with membranes and extracellular high-molecular-weight structures in *Escherichia coli*. *J Bacteriol* **181**, 5563-5571
7. Vergunst, A. C., Schrammeijer, B., den Dulk-Ras, A., de Vlaam, C. M., Regensburg-Tuink, T. J., and Hooykaas, P. J. (2000) VirB/D4-dependent protein translocation from *Agrobacterium* into plant cells. *Science* **290**, 979-982
8. Karimova, G., Pidoux, J., Ullmann, A., and Ladant, D. (1998) A bacterial

two-hybrid system based on a reconstituted signal transduction pathway. *Proc Natl Acad Sci U S A* **95**, 5752-5756
